# Muscular strategy shift in human running: dependence of running speed on hip and ankle muscle performance

Tim W. Dorn, Anthony G. Schache and Marcus G. Pandy

10.1242/jeb.075051

There was an error published in *J. Exp. Biol.* **215**, 1944-1956.

In Fig. 2B, the units for the right-hand y-axis were incorrect. The correct version of the figure is given below.

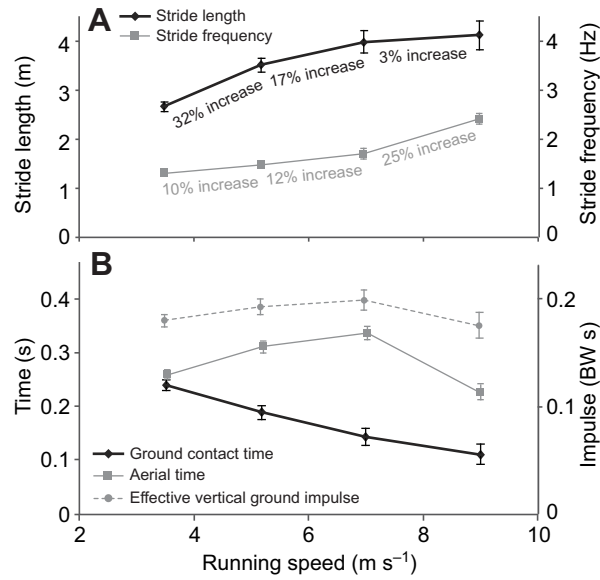

We apologise to the authors and readers for any inconvenience caused.
